# Supplementary material for: Enlarged Interlayer Spacing of Marigold-Shaped 1T-MoS2 with Sulfur Vacancies via Oxygen-Assisted Phosphorus Embedding for Rechargeable Zinc-Ion Batteries
Source: MDPI journal article supplement (doi:10.3390/nano13071185), 2023-03-27
Supplement: s1 [file s1]

## Supporting Information

Article

# Enlarged Interlayer Spacing of Marigold-Shaped 1T-MoS<sub>2</sub> with Sulfur Vacancies via Oxygen-Assisted Phosphorus Embedding for Rechargeable Zinc-Ion Batteries

Qinhu Xu, Xinyu Li \*, Luchen Wu, Zhen Zhang, Yong Chen, Ling Liu and Yong Cheng \*

College of Science & Ministry-Province Jointly-Constructed Cultivation Base for State Key Laboratory of Processing for Non-Ferrous Metal and Featured Materials & Key Lab. of Nonferrous Materials and New Processing Technology & Network and Information Center, Guilin University of Technology, Guilin 541004, China

\* Correspondence: [lixinyu5260@163.com](mailto:lixinyu5260@163.com) (X.L.); [hb\\_cy@163.com](mailto:hb_cy@163.com) (Y.C.)

Chemicals: Conductive acetylene black, polyvinylidene fluoride (PVDF) were purchased from Guangdong Canrd New Energy Technology Co., Ltd. Ammonium molybdate tetrahydrate ((NH<sub>4</sub>)<sub>6</sub>Mo<sub>7</sub>O<sub>24</sub>·4H<sub>2</sub>O) and N-methyl pyrrolidone (NMP) were from Shanghai Aladdin Bio-Chem Technology Co., LTD. Thiourea (CH<sub>4</sub>N<sub>2</sub>S) and Sodium hypophosphite (NaH<sub>2</sub>PO<sub>2</sub>) were purchased from Shanghai Macklin Biochemical Co., Ltd. Zinc trifluoromethanesulfonate (Zn(CF<sub>3</sub>SO<sub>3</sub>)<sub>2</sub>) was purchased from TCI (Shanghai) Development Co., Ltd.

The electrochemical tests were conducted on the two-electrode CR2016 type coin cells. The active material (P-MoS<sub>2</sub>) was dispersed in N-methyl pyrrolidone (NMP) solution with polyvinylidene fluoride (PVDF) and Super P with an 7:2:1 weight ratio. P-MoS<sub>2</sub> /Zn batteries were assembled using P-MoS<sub>2</sub> cathode and zinc plate anode with 3 M Zn(CF<sub>3</sub>SO<sub>3</sub>)<sub>2</sub> aqueous solution as an electrolyte as well as a microporous glass fiber membrane (Whatman) as the separator. Calculation method of surface-controlled capacitive and diffusion-limited behaviors and GITT tests. Cyclic voltammetry (CV) measurements were conducted using a Princeton Analytical electrochemical workstation. The galvanostatic charge/discharge test and the galvanostatic intermittent

titration technique (GITT) of P-MoS<sub>2</sub> /Zn batteries were tested by the Neware battery tester (CT4008). The Zn<sup>2+</sup> diffusivity ( $D^{GITT}$ ) can be calculated by the following equation:[64,65]

$$D^{GITT} = \frac{4L^2}{\pi\tau} \left( \frac{\Delta E_s}{\Delta E_t} \right)^2 \quad (S1)$$

Where  $t$  and  $\tau$  represent the duration pulse (s) and relaxation time (s), respectively.  $L$  corresponds to the Zn<sup>2+</sup> diffusion length (equal to the thickness of the electrode).  $\Delta E_s$  is the steady-state potential change (V) by the current pulse.  $\Delta E_t$  is the voltage change (V) during the constant current pulse (eliminating the voltage changes after relaxation time).

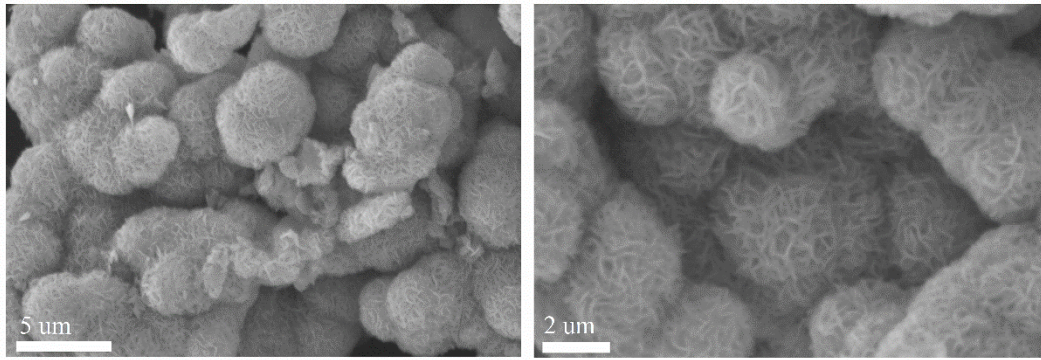

Figure S1. SEM images of the sample of Pristine MoS<sub>2</sub>.

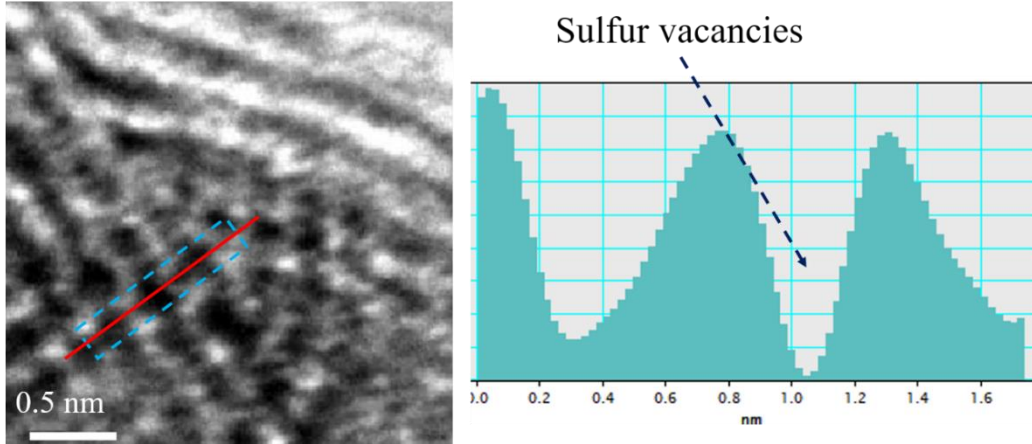

Figure S2. The corresponding atomic intensity profile along the dotted red line for P-MoS<sub>2</sub>

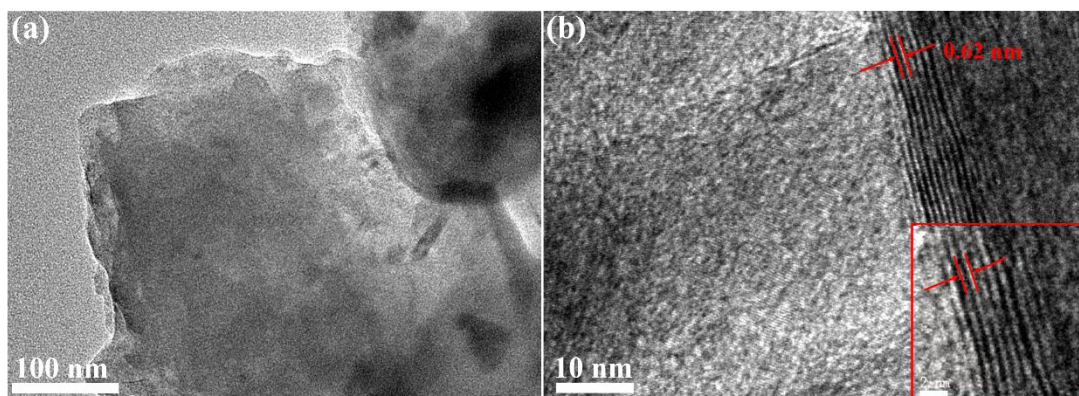

Figure S3. TEM images of (a, b) Pristine MoS<sub>2</sub>

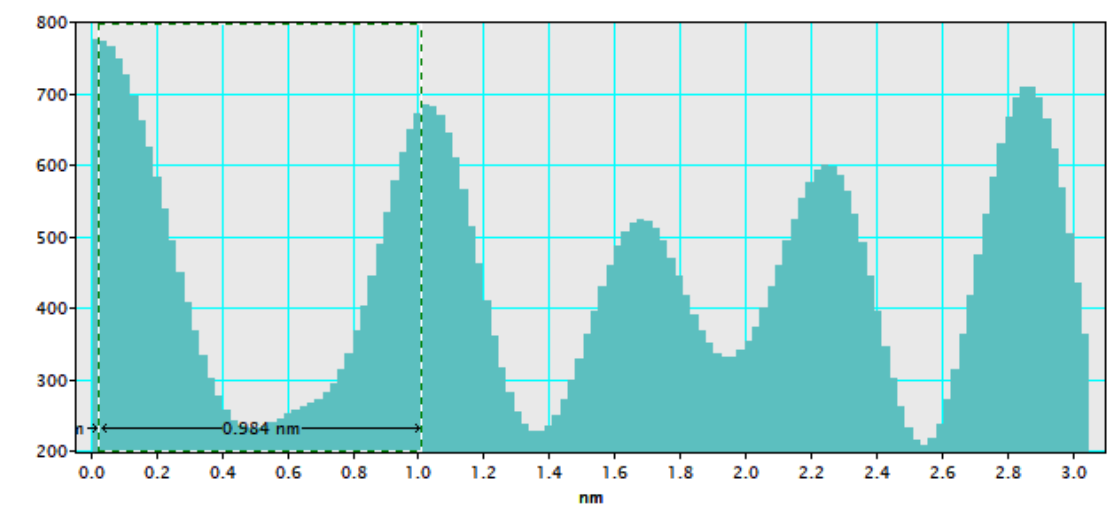

Figure S4. Line scan of the HRTEM image

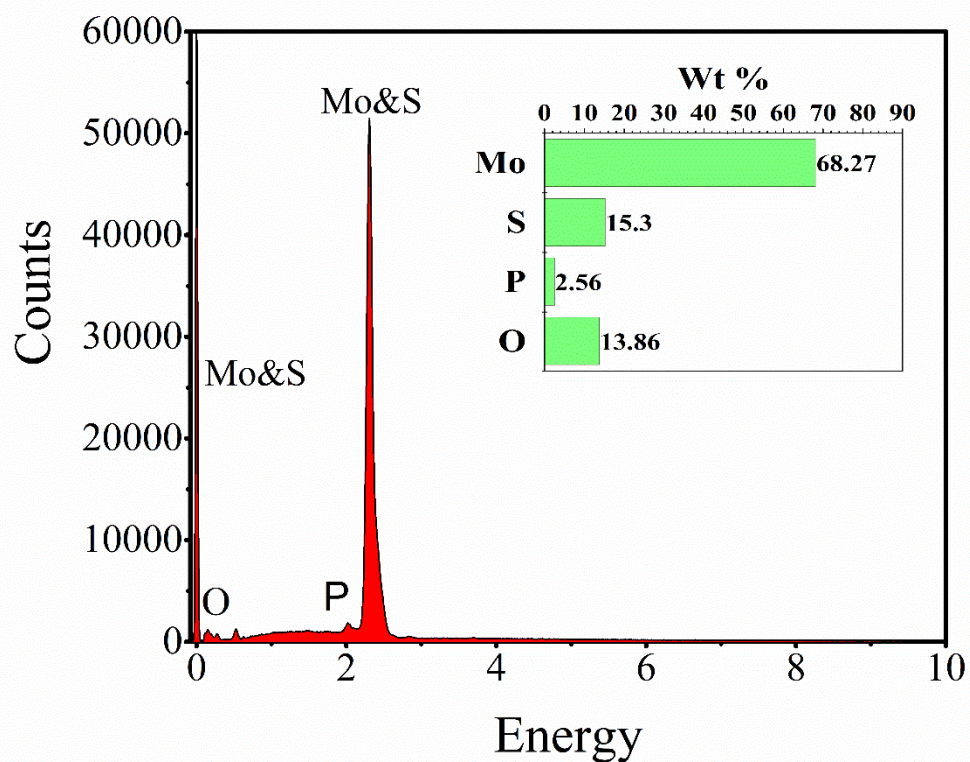

Figure S5. EDS spectrum

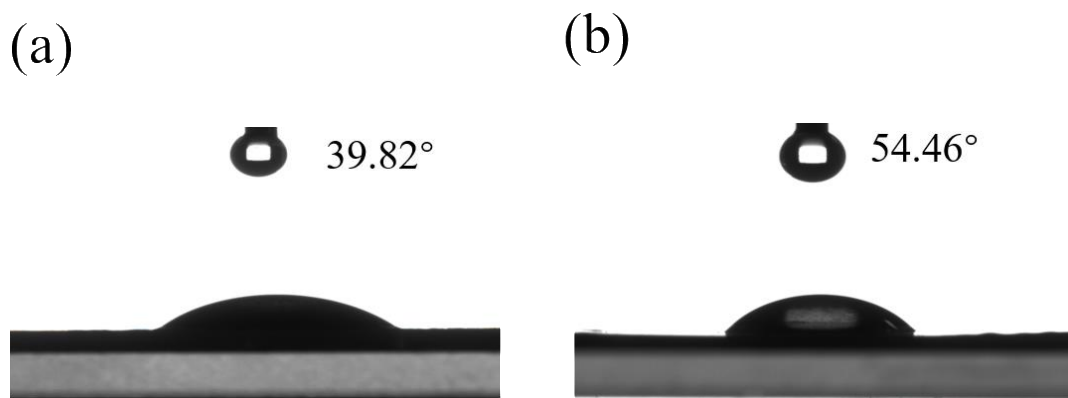

Figure S6. Contact angles with water for (a) P-MoS<sub>2</sub> and (b) Pristine MoS<sub>2</sub>.



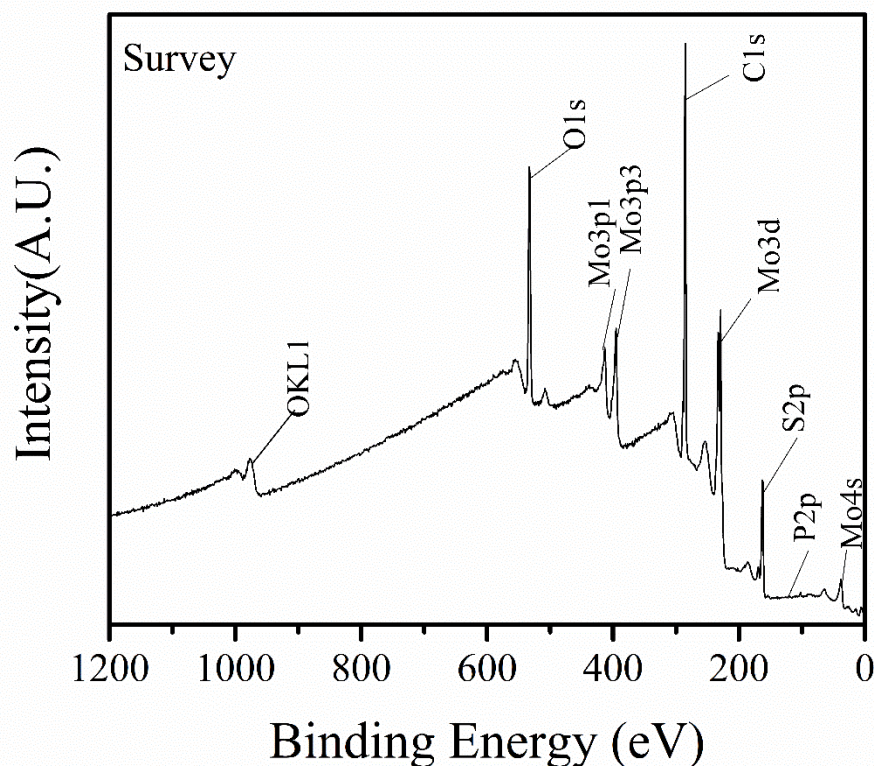

Figure S7. XPS spectra of full scan for P-MoS<sub>2</sub>.

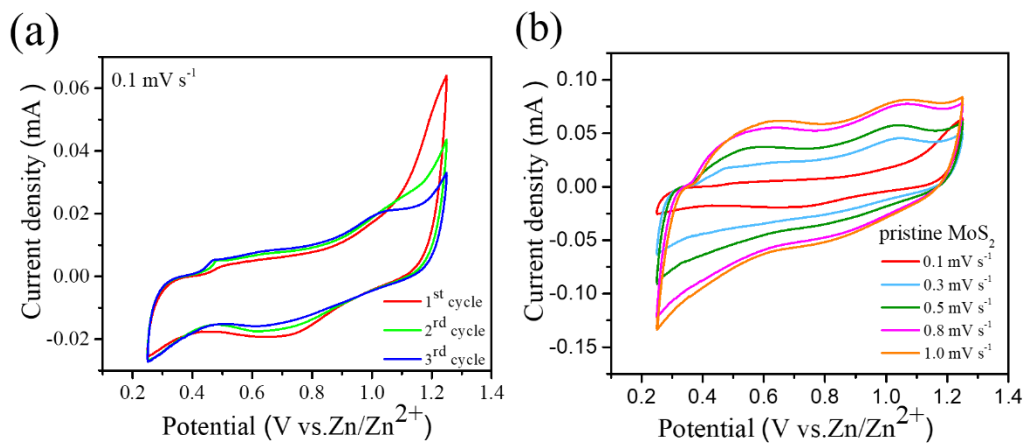

Figure S8. The initial five CV curves of (a) Pristine MoS<sub>2</sub> and (b) CV curves at various scan rates of Pristine MoS<sub>2</sub>.

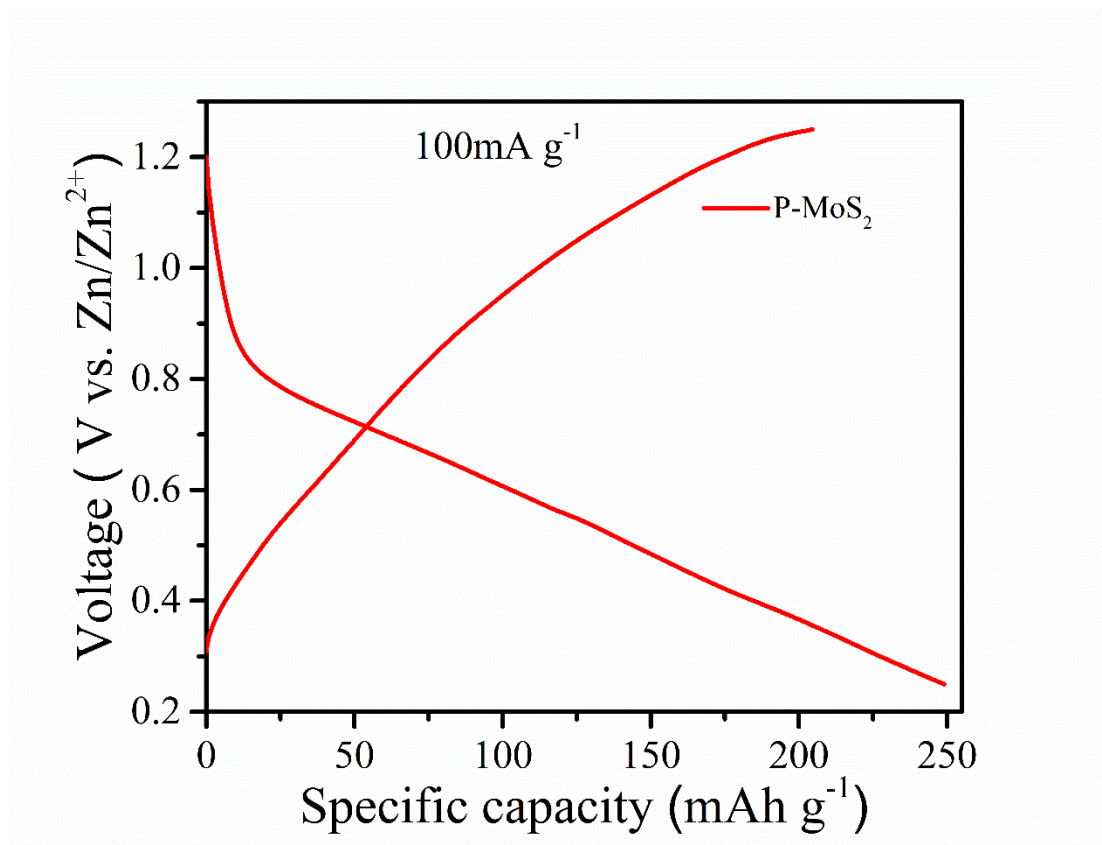

Figure S9. Initial charge-discharge profile of P-MoS<sub>2</sub> nanosheets at 0.1 A g<sup>-1</sup>

At the cathode:  $P - MoS_2 + xZn^{2+} + 2xe^- = Zn_xP - MoS_2$

At the anode:  $xZn^{2+} + 2xe^- = xZn$

n is determined based on the following equations:

$$Q_{theoretical} = \frac{2nF}{3600 \cdot M} \text{ mAh/g} \quad (S2)$$

(F = NA \* e = 96500 C/mol, NA = 6.02 × 10<sup>23</sup>, 1 Ah = 1 A × 3600 s = 3600 C, M = 160.07 g/mol)

**Table S1.** Phase content of Mo 3d in each sample

| Phase | Binding Energy(eV) | P-MoS <sub>2</sub> |
|-------|--------------------|--------------------|
| 2H    | 229.50             | 22.3%              |
|       | 232.75             | 22.3%              |
| 1T    | 228.55             | 30.6%              |
|       | 231.76             | 22.4%              |

**Table S2.** Atomic percentages of P-MoS<sub>2</sub> by XPS measurement

| Atomic(%)          | Mo 3d | S 2p  | O 1s  | P 2p | S/Mo      |
|--------------------|-------|-------|-------|------|-----------|
| P-MoS <sub>2</sub> | 6.29  | 10.89 | 18.07 | 0.61 | 1.73<1.95 |

**Table S3.** Comparisons of performance of MoS<sub>2</sub> synthesized under different conditions in neutral media.

| Positive materials<br>(experimental<br>group)    | Specific<br>capacity @ 0.1<br>A g <sup>-1</sup> (mAh g <sup>-1</sup> ) | Reference                                     |
|--------------------------------------------------|------------------------------------------------------------------------|-----------------------------------------------|
| P-MoS <sub>2</sub>                               | 249 mAh g <sup>-1</sup>                                                | This work                                     |
| Glu-MoS <sub>2</sub>                             | 182 mAh g <sup>-1</sup>                                                | <i>Chem. Eng. J.</i> 416(2021)127704          |
| MoS <sub>2-x</sub>                               | 128 mAh g <sup>-1</sup>                                                | <i>Energy Storage Mater.</i> 2019, 16,527-534 |
| MoS <sub>2</sub> -O                              | 232 mAh g <sup>-1</sup>                                                | <i>Nano Lett.</i> 2019, 19, 3199-3206.        |
| Co <sub>x</sub> Mo <sub>1-x</sub> S <sub>2</sub> | 305.4 mAh g <sup>-1</sup>                                              | <i>Energy Storage Mater.</i> 55 (2023) 1-11   |
| MoS <sub>2</sub> /rGO                            | 283 mAh g <sup>-1</sup>                                                | <i>Adv. Mater.</i> 2021, 33, 2007480          |

**Table S4.** Charge transfer resistance of MoS<sub>2</sub> samples.

| Samples                            | Charge transfer resistance (R <sub>ct</sub> , Ω) |
|------------------------------------|--------------------------------------------------|
| P-MoS <sub>2</sub>                 | 42.82                                            |
| Pristine MoS <sub>2</sub>          | 184.8                                            |
| P-MoS <sub>2</sub> after 10 cycles | 40.58                                            |

## References

64. Zhang, N.; Cheng, F.; Liu, Y.; Zhao, Q.; Lei, K.; Chen, C.; Liu, X.; Chen, J. Cation-Deficient Spinel ZnMn<sub>2</sub>O<sub>4</sub> Cathode in Zn(CF<sub>3</sub>SO<sub>3</sub>)<sub>2</sub> Electrolyte for Rechargeable Aqueous Zn-Ion Battery. *Journal of the American Chemical Society* **2016**, *138*, 12894-12901, doi:https://doi.org/10.1021/jacs.6b05958.
65. Shaju, K.M.; Subba Rao, G.V.; Chowdari, B.V.R. Li ion kinetic studies on spinel cathodes, Li(M<sub>1</sub>/6Mn<sub>11</sub>/6)O<sub>4</sub> (M = Mn, Co, CoAl) by GITT and EIS. *Journal of Materials Chemistry* **2003**, *13*, 106-113, doi:http://dx.doi.org/10.1039/B207407A.
